# Supplementary material
Source: Research Square preprint supplement (doi:10.21203/rs.3.rs-8658061/v1)
Supplement: Supplementary file 1 [file a4f73b1fbbe69d6f2d91bcdf.docx]

# Supplementary File 1

## Sociodemographic and Health-Related Information Form

1. What is your gender?
☐ Male
☐ Female

2. What is your age group?
☐ 18–24 years
☐ 25–44 years
☐ 45–65 years

3. What is your marital status?
☐ Married
☐ Single
☐ Divorced
☐ Widowed
☐ Other

4. What is your highest level of education?
☐ Primary school
☐ Secondary school
☐ High school
☐ University degree or higher

5. Do you currently smoke?
☐ Yes
☐ No

6. What is your income status?
☐ Income is higher than expenses
☐ Income is equal to expenses
☐ Income is lower than expenses

7. What is your employment status?
☐ Not working
☐ Working
If working, please specify your occupation: ___________________________

8. Do you have any diagnosed chronic disease(s)?
☐ No
☐ Yes
If yes, please specify: ___________________________

9. Do any of your first-degree relatives (parents, children, siblings) have a chronic disease?
☐ Yes
☐ No

10. Do you regularly use any medication(s)?
☐ Yes
☐ No

11. Is there a physician among your first-degree relatives (parents, children, siblings)?
☐ Yes
☐ No

12. How often do you use the internet for health-related purposes?
☐ Never
☐ Rarely
☐ Sometimes
☐ Often
☐ Always

13. On average, how many times per year do you visit a healthcare facility for your own health?
☐ Once per year
☐ Twice per year
☐ Three times per year
☐ Four times or more per year
